# Supplementary material for: Cardiometabolic Risk Factors in Childhood, Adolescent and Young Adult Survivors of Acute Lymphoblastic Leukemia – A Petale Cohort
Source: PubMed Central journal article supplement (PMC5732194; doi:10.1038/s41598-017-17716-0), 2017-12-15
Supplement: 41598_2017_17716_MOESM1_ESM.pdf [file 41598_2017_17716_MOESM1_ESM.pdf]

## **Supplementary Information**

### **CARDIOMETABOLIC RISK FACTORS IN CHILDHOOD, ADOLESCENT AND YOUNG ADULT SURVIVORS OF ACUTE LYMPHOBLASTIC LEUKEMIA SURVIVORS – A PETALE COHORT**

**Emile Levy<sup>1</sup>, Mariia Samoilenko<sup>3</sup>, Sophia Morel<sup>1</sup>, Jade England<sup>2</sup>, Devendra Amre<sup>2</sup>, Laurence Bertout<sup>2</sup>, Simon Drouin<sup>2</sup>, Caroline Laverdière<sup>2</sup>, Maja Krajinovic<sup>2</sup>, Daniel Sinnett<sup>2</sup>, Geneviève Lefebvre<sup>3</sup>, Valérie Marcil<sup>1\*</sup>**

Research Centre, Sainte-Justine University Health Center, Departments of <sup>1</sup>Nutrition and <sup>2</sup>Pediatrics, Université de Montréal, Montreal, Quebec, Canada, H3T 1C5, <sup>3</sup>Department of Mathematics, Université du Québec à Montréal, Montreal, Quebec, Canada, H3C 3P8.

**Supplementary Table 1.** Cut-off values for cardiometabolic outcomes

| <b>Risk factor</b>           | <b>Adults</b>                                 | <b>Children</b>                                                       |
|------------------------------|-----------------------------------------------|-----------------------------------------------------------------------|
| <b>BMI</b>                   |                                               |                                                                       |
| Overweight                   | >25 and <30 kg/m <sup>2</sup>                 | >85 <sup>th</sup> and <97 <sup>th</sup> percentile                    |
| Obesity                      | ≥30 kg/m <sup>2</sup>                         | ≥97 <sup>th</sup> percentile                                          |
| <b>Waist circumference</b>   |                                               |                                                                       |
| Borderline                   | ≥94 and <102 cm (men); ≥80 and <88 cm (women) | ≥90 <sup>th</sup> and <95 <sup>th</sup> percentile                    |
| High                         | ≥102 cm (men) and ≥88 cm (women)              | ≥95 <sup>th</sup> percentile                                          |
| <b>Hypertension</b>          |                                               |                                                                       |
| Pre-hypertension             | ≥130/85 and <140/90 mmHg                      | ≥90 <sup>th</sup> and <95 <sup>th</sup> percentile for age and height |
| Hypertension                 | ≥140/90 mmHg                                  | ≥95 <sup>th</sup> percentile for age and height                       |
| <b>Blood fasting glucose</b> |                                               |                                                                       |
| At risk                      | ≥5.6 and <6.1 mmol/L                          | ≥5.6 and <6.1 mmol/L                                                  |
| Prediabetes                  | ≥6.1 mmol/L                                   | ≥6.1 mmol/L                                                           |
| <b>Glycated hemoglobin</b>   |                                               |                                                                       |
| At risk                      | ≥5.5 and <6%                                  | ≥5.5 and <6%                                                          |
| Prediabetes                  | ≥6% and <6.5%                                 | ≥6% and <6.5%                                                         |
| <b>Triglycerides</b>         |                                               |                                                                       |
| Borderline                   | ≥1.3 and <1.7 mmol/L                          | ≥1.00 and <1.47 mmol/L                                                |
| High                         | ≥1.7 mmol/L                                   | ≥1.47 mmol/L                                                          |
| <b>LDL-cholesterol</b>       |                                               |                                                                       |
| Borderline                   | ≥2.6 and <3.4 mmol/L                          | ≥2.85 and <3.36 mmol/L                                                |
| High                         | ≥3.4 mmol/L                                   | ≥3.36 mmol/L                                                          |
| <b>HDL-cholesterol</b>       |                                               |                                                                       |
| Low                          | <1.03 (men) and <1.3 mmol/L (women)           | <1.03 mmol/L                                                          |

BMI, body mass index; HOMA-IR, homeostasis model assessment; LDL, low-density lipoprotein; HDL, high-density lipoprotein.

**Supplementary Table 2.** Distribution of cardiometabolic outcomes according to cut-off values of survivors of childhood acute lymphoblastic leukemia from the PETALE cohort

|                                 | <b>Total</b><br>(N=247) | <b>Adults</b><br>(N=162) | <b>Men</b><br>(N=80) | <b>Women</b><br>(N=82)<br>N (%) | <b>Children</b><br>(N=85) | <b>Boys</b><br>(N=42) | <b>Girls</b><br>(N=43) |
|---------------------------------|-------------------------|--------------------------|----------------------|---------------------------------|---------------------------|-----------------------|------------------------|
| <b>BMI</b>                      |                         |                          |                      |                                 |                           |                       |                        |
| Normal                          | 152 (61.5)              | 92 (56.8)                | 49 (61.2)            | 43 (52.4)                       | 60 (70.6)                 | 26 (61.9)             | 34 (79.1)              |
| Overweight                      | 60 (24.3)               | 42 (25.9)                | 21 (25.3)            | 21 (25.6)                       | 18 (21.2)                 | 11 (26.2)             | 7 (16.2)               |
| Obesity                         | 35 (14.2)               | 28 (17.3)                | 10 (12.50)           | 18 (22.0)                       | 7 (8.2)                   | 5 (11.9)              | 2 (4.7)                |
| <b>Waist circumference</b>      |                         |                          |                      |                                 |                           |                       |                        |
| Normal                          | 131 (53.0)              | 80 (50.0)                | 56 (70.00)           | 25 (30.5)                       | 50 (58.8)                 | 24 (57.1)             | 26 (60.5)              |
| Borderline                      | 38 (15.4)               | 32 (19.7)                | 13 (16.2)            | 19 (23.2)                       | 6 (7.1)                   | 2 (4.8)               | 4 (9.3)                |
| High                            | 78 (31.6)               | 49 (30.3)                | 11 (13.8)            | 38 (46.3)                       | 29 (34.1)                 | 16 (38.1)             | 13 (30.2)              |
| <b>Systolic blood pressure</b>  |                         |                          |                      |                                 |                           |                       |                        |
| Normal                          | 222 (89.9)              | 145 (89.5)               | 66 (82.5)            | 79 (96.3)                       | 77 (90.6)                 | 35 (83.3)             | 42 (97.7)              |
| Pre-hypertension                | 21 (8.5)                | 14 (8.6)                 | 11 (13.7)            | 3 (3.7)                         | 7 (8.2)                   | 6 (14.3)              | 1 (2.3)                |
| Hypertension                    | 4 (1.6)                 | 3 (1.9)                  | 3 (3.8)              | 0 (0)                           | 1 (1.2)                   | 1 (2.4)               | 0 (0)                  |
| <b>Diastolic Blood pressure</b> |                         |                          |                      |                                 |                           |                       |                        |
| Normal                          | 239 (96.8)              | 155 (95.7)               | 76 (95.0)            | 79 (96.3)                       | 84 (98.8)                 | 41 (97.6)             | 43 (100)               |
| Pre-hypertension                | 7 (2.8)                 | 6 (3.7)                  | 3 (3.7)              | 3 (3.7)                         | 1 (1.2)                   | 1 (2.4)               | 0 (0)                  |
| Hypertension                    | 1 (0.4)                 | 1 (0.6)                  | 1 (1.3)              | 0 (0)                           | 0 (0)                     | 0 (0)                 | 0 (0)                  |
| <b>Fasting blood glucose</b>    |                         |                          |                      |                                 |                           |                       |                        |
| Optimal                         | 217 (87.9)              | 136 (84.0)               | 63 (78.7)            | 73 (89.0)                       | 81 (95.3)                 | 39 (92.9)             | 42 (97.7)              |
| At risk                         | 23 (9.3)                | 19 (11.7)                | 15 (18.8)            | 4 (4.9)                         | 4 (4.7)                   | 3 (7.1)               | 1 (2.3)                |
| Prediabetes                     | 7 (2.8)                 | 7 (4.3)                  | 2 (2.5)              | 5 (6.1)                         | 0 (0.0)                   | 0 (0.0)               | 0 (0.0)                |
| <b>HbA1c</b>                    |                         |                          |                      |                                 |                           |                       |                        |
| Optimal                         | 210 (85.0)              | 142 (87.6)               | 71 (88.8)            | 71 (86.6)                       | 68 (80.0)                 | 33 (78.6)             | 35 (81.4)              |
| At-risk                         | 33 (13.4)               | 17 (10.5)                | 8 (10.0)             | 9 (11.0)                        | 16 (18.8)                 | 9 (21.4)              | 7 (16.3)               |
| Prediabetes                     | 4 (1.6)                 | 3 (1.9)                  | 1 (1.2)              | 2 (2.4)                         | 1 (1.2)                   | 0 (0.00)              | 1 (2.3)                |
| <b>HOMA-IR</b>                  |                         |                          |                      |                                 |                           |                       |                        |
| Normal                          | 207 (83.8)              | 133 (82.1)               | 69 (86.2)            | 64 (78.0)                       | 74 (87.1)                 | 37 (88.10)            | 37 (86.0)              |
| High                            | 40 (16.2)               | 29 (17.9)                | 11 (13.8)            | 18 (22.0)                       | 11 (12.9)                 | 5 (11.90)             | 6 (14.0)               |
| <b>Triglycerides</b>            |                         |                          |                      |                                 |                           |                       |                        |
| Optimal                         | 175 (70.8)              | 120 (74.0)               | 64 (80.0)            | 56 (68.3)                       | 55 (64.7)                 | 27 (64.3)             | 28 (65.1)              |
| Borderline                      | 42 (17.0)               | 21 (13.0)                | 6 (7.5)              | 15 (18.3)                       | 21 (24.7)                 | 12 (28.6)             | 9 (20.9)               |
| High                            | 30 (12.2)               | 21 (13.0)                | 10 (12.5)            | 11 (13.4)                       | 9 (10.6)                  | 3 (7.1)               | 6 (14.0)               |
| <b>LDL-cholesterol</b>          |                         |                          |                      |                                 |                           |                       |                        |
| Optimal                         | 139 (56.3)              | 73 (45.1)                | 33 (41.2)            | 40 (48.8)                       | 66 (77.7)                 | 34 (81.0)             | 32 (74.4)              |
| Borderline                      | 65 (26.3)               | 53 (32.7)                | 27 (33.8)            | 26 (31.7)                       | 12 (14.1)                 | 4 (9.5)               | 8 (18.6)               |
| High                            | 43 (17.4)               | 36 (22.2)                | 20 (25.00)           | 16 (19.5)                       | 7 (8.2)                   | 4 (9.5)               | 3 (7.0)                |
| <b>HDL-cholesterol</b>          |                         |                          |                      |                                 |                           |                       |                        |
| Optimal                         | 190 (76.9)              | 119 (73.5)               | 66 (82.5)            | 53 (64.6)                       | 71 (83.5)                 | 31 (73.8)             | 40 (93.0)              |
| Low                             | 57 (23.1)               | 43 (26.5)                | 14 (17.5)            | 29 (35.4)                       | 14 (16.5)                 | 11 (26.2)             | 3 (7.0)                |

BMI, body mass index; HOMA-IR, homeostasis model assessment; LDL, low-density lipoprotein; HDL, high-density lipoprotein; HbA1c: glycated hemoglobin.

**Supplementary Table 3.** Predictors of cardiometabolic complications in survivors of childhood acute lymphoblastic leukemia: simple log-binomial regression univariate analyses

|                                                | High BMI             | High waist circumference | High TG             | High LDL-cholesterol  | Low HDL-cholesterol | High glucose         | High HbA1c           |
|------------------------------------------------|----------------------|--------------------------|---------------------|-----------------------|---------------------|----------------------|----------------------|
| Relative Risk (95% CI)                         |                      |                          |                     |                       |                     |                      |                      |
| CRT (yes vs. none)                             | 1.30<br>(0.68-2.50)  | 1.29<br>(0.87-1.90)      | 1.18<br>(0.58-2.36) | 5.17*<br>(2.11-12.68) | 1.17<br>(0.73-1.87) | 4.08<br>(0.50-33.39) | 2.04<br>(0.22-19.34) |
| Gender (males vs. females)                     | 0.77<br>(0.41-1.43)  | 0.54<br>(0.37-0.80)      | 0.78<br>(0.40-1.54) | 1.29<br>(0.75-2.24)   | 0.80<br>(0.51-1.27) | 0.41<br>(0.08-2.07)  | 0.34<br>(0.04-3.24)  |
| Age at diagnosis (per unit of year)            | 1.01<br>(0.95-1.08)  | 1.01<br>(0.97-1.05)      | 1.05<br>(0.98-1.12) | 0.98<br>(0.92-1.05)   | 1.01<br>(0.96-1.06) | 1.13<br>(0.98-1.29)  | 1.04<br>(0.86-1.27)  |
| Age at interview (per unit of year)            | 1.08*<br>(1.03-1.12) | 1.02<br>(0.99-1.05)      | 1.04<br>(0.99-1.09) | 1.06*<br>(1.02-1.09)  | 1.03<br>(0.99-1.06) | 1.14*<br>(1.03-1.26) | 1.08<br>(0.94-1.24)  |
| Obesity at the end of treatment (yes vs. none) | 2.90*<br>(1.40-5.54) | 2.23*<br>(1.50-3.30)     | 1.93<br>(0.78-4.02) | 0.84<br>(0.37-1.88)   | 1.09<br>(0.60-2.01) | CP                   | 4.05<br>(0.27-63.37) |
| Δ Percentile BMI (unit=5%)                     | 1.01<br>(0.94-1.08)  | 1.03<br>(0.99-1.07)      | 0.96<br>(0.89-1.04) | 0.96<br>(0.90-1.03)   | 0.99<br>(0.94-1.04) | 1.07<br>(0.89-1.30)  | 0.90<br>(0.68-1.19)  |

Simple log-binomial regression analysis for each cardiometabolic complication as a function of each predictor was performed. CRT: cranial radiotherapy; BMI: body mass index; RR: relative risk; CI: confidence interval; TG: triglycerides; LDL: low-density lipoprotein; HDL: high-density lipoprotein. Δ BMI percentile = percentile BMI at end of treatment - percentile BMI at diagnosis. CP: This analysis could not be performed because of convergence problems. \*P<0.05.

**Supplementary Table 4.** Predictors of cardiometabolic complications in survivors of childhood acute lymphoblastic leukemia: multiple log-binomial univariate analyses

|                                                   | High BMI               | High waist circumference | High TG             | High LDL-cholesterol  | Low HDL-cholesterol  |
|---------------------------------------------------|------------------------|--------------------------|---------------------|-----------------------|----------------------|
|                                                   | Relative Risk (95% CI) |                          |                     |                       |                      |
| CRT (yes vs. none)                                | 1.07<br>(0.49-2.36)    | 1.36<br>(0.87-2.15)      | 1.29<br>(0.55-3.01) | 4.78*<br>(1.72-13.28) | 1.22<br>(0.70, 2.13) |
| Gender (males vs. females)                        | 0.95<br>(0.48-1.90)    | 0.65<br>(0.41-1.03)      | 0.80<br>(0.37-1.75) | 1.12<br>(0.64-1.94)   | 0.80<br>(0.48, 1.33) |
| Age at diagnosis<br>(per unit of year)            | 0.97<br>(0.88-1.07)    | 1.04<br>(0.99-1.11)      | 1.06<br>(0.96-1.17) | 0.87<br>(0.81-0.95)   | 0.97<br>(0.90, 1.05) |
| Age at interview<br>(per unit of year)            | 1.11*<br>(1.02-1.20)   | 1.00<br>(0.95-1.05)      | 0.98<br>(0.91-1.07) | 1.11*<br>(1.04-1.19)  | 1.05<br>(0.99, 1.10) |
| Obesity at the end of<br>treatment (yes vs. none) | 2.73*<br>(1.32-5.63)   | 2.14*<br>(1.36-3.38)     | 1.94<br>(0.84-4.49) | 0.74<br>(0.34-1.58)   | 1.00<br>(0.53, 1.88) |
| Δ Percentile BMI (unit=5%)                        | 0.99<br>(0.92-1.06)    | 1.01<br>(0.97-1.05)      | 0.97<br>(0.89-1.05) | 0.96<br>(0.90-1.01)   | 0.99<br>(0.94, 1.04) |

Multiple log-binomial regression analysis was performed with a model including the predictors: gender, exposure to CRT, age at diagnosis, age at interview, obesity at end of treatment and delta BMI percentile. CRT: cranial radiotherapy; BMI: body mass index; RR; CI: confidence interval; TG: triglycerides; LDL: low-density lipoprotein; HDL: high-density lipoprotein. Δ BMI percentile = percentile BMI at end of treatment - percentile BMI at diagnosis. \*P<0.05.
